# Supplementary material
Source: PubMed Central journal article supplement (PMC5561666)
Supplement: NIHMS884800-supplement-Supp_TableS1.pdf [file NIHMS884800-supplement-Supp_TableS1.pdf]

**Supplementary Table 1. Patient distribution according to GIT 2.0 scores (A) and organisms significantly associated with GIT 2.0 scores (B).**

**Table 1A. SSc patient distribution by GIT 2.0-based symptom severity groups.**

| <b>Category</b>            | <b>Low group (none to mild symptoms), N</b> | <b>High group (moderate to severe symptoms), N</b> |
|----------------------------|---------------------------------------------|----------------------------------------------------|
| <b>Total score</b>         |                                             |                                                    |
| Cecum                      | 8                                           | 8                                                  |
| Sigmoid                    | 8                                           | 9                                                  |
| <b>Constipation</b>        |                                             |                                                    |
| Cecum                      | 7                                           | 9                                                  |
| Sigmoid                    | 7                                           | 10                                                 |
| <b>Diarrhea</b>            |                                             |                                                    |
| Cecum                      | 8                                           | 8                                                  |
| Sigmoid                    | 8                                           | 9                                                  |
| <b>Bloating/Distension</b> |                                             |                                                    |
| Cecum                      | 7                                           | 9                                                  |
| Sigmoid                    | 7                                           | 10                                                 |

**Table 1B. Organisms associated with GIT 2.0 total score and individual domains.**

| <b>Organism</b>             | <b>Region</b> | <b>Symptom Severity Association</b> | <b>Fold change</b> | <b>q-value</b> |
|-----------------------------|---------------|-------------------------------------|--------------------|----------------|
| <i>Bacteroides fragilis</i> | Cecum         | Low Total GIT                       | 12.1               | 0.02           |
|                             | Sigmoid       | Low Total GIT                       | 17.3               | 0.002          |

|                                          |         |                          |       |        |
|------------------------------------------|---------|--------------------------|-------|--------|
|                                          | Cecum   | Low Diarrhea             | 6.1   | 0.02   |
|                                          | Sigmoid | Low Diarrhea             | 7.0   | 0.02   |
|                                          | Cecum   | Low Bloating/Distension  | 18.4  | 0.002  |
|                                          | Sigmoid | Low Bloating/Distension  | 17.2  | 0.002  |
| <b><i>Candidatus<br/>Arthromitus</i></b> | Cecum   | Low Total GIT            | 18.9  | 0.0001 |
|                                          | Cecum   | Low Bloating/Distension  | 21.9  | 0.0001 |
| <b><i>Clostridium (genus)</i></b>        | Cecum   | Low Constipation         | 3.1   | 0.097  |
| <b><i>Fusobacterium (genus)</i></b>      | Sigmoid | High Total GIT           | -30.0 | 0.001  |
|                                          | Cecum   | High Constipation        | -18.1 | 0.001  |
|                                          | Sigmoid | High Bloating/Distension | -24.2 | 0.0003 |
| <b><i>Actinobacillus (genus)</i></b>     | Sigmoid | High Constipation        | -7.0  | 0.03   |
|                                          | Sigmoid | High Bloating/Distension | -7.0  | 0.02   |
