# Supplementary material
Source: PubMed Central journal article supplement (PMC5561666)
Supplement: NIHMS884800-supplement-Supp_TableS2.pdf [file NIHMS884800-supplement-Supp_TableS2.pdf]

**Supplementary Table 2. Altered metabolic proficiencies of microbiota in SSc patients in the cecum (A) and Sigmoid (B) regions.**

**Table 2A. Differences of KEGG pathway and orthology in SSc versus healthy controls (Nrml) in the cecum region.\***

| KEGG Pathway  |                       |                                             | KEGG orthology                                      |                   |             |         |
|---------------|-----------------------|---------------------------------------------|-----------------------------------------------------|-------------------|-------------|---------|
| KO Pathway ID | Pathway (L2)          | Pathway (L3)                                | KO Gene ID: Name                                    | Gene increased in | Effect size | q value |
| ko00250       | Amino Acid Metabolism | Alanine, aspartate and glutamate metabolism | K00266: glutamate synthase (NADPH/NADH) small chain | Nrml              | 2.38        | 0.002   |
| ko00270       | Amino Acid Metabolism | Cysteine and methionine metabolism          | K00640: serine O-acetyltransferase                  | Nrml              | 2.05        | 0.048   |
| ko00270       | Amino Acid Metabolism | Cysteine and methionine metabolism          | K01740: O-acetylhomoserine (thiol)-lyase            | Nrml              | 2.00        | 0.019   |

|         |                                             |                                             |                                                                      |      |      |       |
|---------|---------------------------------------------|---------------------------------------------|----------------------------------------------------------------------|------|------|-------|
| ko00260 | Amino Acid Metabolism                       | Glycine, serine and threonine metabolism    | K01834: phosphoglycerate mutase                                      | Nrml | 2.26 | 0.013 |
| ko00360 | Amino Acid Metabolism                       | Phenylalanine metabolism                    | K01912: phenylacetate-CoA ligase                                     | Nrml | 2.04 | 0.098 |
| ko00250 | Amino Acid Metabolism                       | Alanine, aspartate and glutamate metabolism | K01955: carbamoyl-phosphate synthase large subunit                   | Nrml | 2.11 | 0.009 |
| ko00340 | Amino Acid Metabolism                       | Histidine metabolism                        | K11755: phosphoribosyl-ATP pyrophosphohydrolase / phosphoribosyl-AMP | Nrml | 2.00 | 0.003 |
| ko00940 | Biosynthesis of Other Secondary Metabolites | Phenylpropanoid biosynthesis                | K05349: beta-glucosidase                                             | Nrml | 2.52 | 0.061 |
| ko05230 | Cancers                                     | Central carbon metabolism in cancer         | K00850: 6-phosphofructokinase                                        | Nrml | 2.02 | 0.066 |
| ko05230 | Cancers                                     | Central carbon metabolism                   | K01834:                                                              | Nrml | 2.26 | 0.013 |

|         |                            |                                    |                                                                      |      |      |       |
|---------|----------------------------|------------------------------------|----------------------------------------------------------------------|------|------|-------|
|         |                            | in cancer                          | phosphoglycerate mutase                                              |      |      |       |
| ko00020 | Carbohydrate<br>Metabolism | Citrate cycle (TCA cycle)          | K00174: 2-oxoglutarate<br>ferredoxin oxidoreductase<br>subunit alpha | Nrml | 2.05 | 0.061 |
| ko00020 | Carbohydrate<br>Metabolism | Citrate cycle (TCA cycle)          | K00175: 2-oxoglutarate<br>ferredoxin oxidoreductase<br>subunit beta  | Nrml | 2.05 | 0.084 |
| ko00010 | Carbohydrate<br>Metabolism | Glycolysis /<br>Gluconeogenesis    | K00850: 6-<br>phosphofructokinase                                    | Nrml | 2.02 | 0.066 |
| ko00030 | Carbohydrate<br>Metabolism | Pentose phosphate<br>pathway       | K00850: 6-<br>phosphofructokinase                                    | Nrml | 2.02 | 0.066 |
| ko00051 | Carbohydrate<br>Metabolism | Fructose and mannose<br>metabolism | K00850: 6-<br>phosphofructokinase                                    | Nrml | 2.02 | 0.066 |
| ko00052 | Carbohydrate<br>Metabolism | Galactose metabolism               | K00850: 6-<br>phosphofructokinase                                    | Nrml | 2.02 | 0.066 |
| ko00030 | Carbohydrate<br>Metabolism | Pentose phosphate<br>pathway       | K00874: 2-dehydro-3-<br>deoxygluconokinase                           | Nrml | 2.04 | 0.004 |
| ko00520 | Carbohydrate               | Amino sugar and nucleotide         | K00983: N-                                                           | Nrml | 2.01 | 0.001 |

|         |                            |                                                |                                                        |      |      |       |
|---------|----------------------------|------------------------------------------------|--------------------------------------------------------|------|------|-------|
|         | Metabolism                 | sugar metabolism                               | acylneuraminate<br>cytidyltransferase                  |      |      |       |
| ko00040 | Carbohydrate<br>Metabolism | Pentose and glucuronate<br>interconversions    | K01051: pectinesterase                                 | Nrml | 2.08 | 0.021 |
| ko00500 | Carbohydrate<br>Metabolism | Starch and sucrose<br>metabolism               | K01051: pectinesterase                                 | Nrml | 2.08 | 0.021 |
| ko00052 | Carbohydrate<br>Metabolism | Galactose metabolism                           | K01187: alpha-<br>glucosidase                          | Nrml | 2.40 | 0.044 |
| ko00500 | Carbohydrate<br>Metabolism | Starch and sucrose<br>metabolism               | K01187: alpha-<br>glucosidase                          | Nrml | 2.40 | 0.044 |
| ko00052 | Carbohydrate<br>Metabolism | Galactose metabolism                           | K01190: beta-<br>galactosidase                         | Nrml | 2.73 | 0.021 |
| ko00520 | Carbohydrate<br>Metabolism | Amino sugar and nucleotide<br>sugar metabolism | K01209: alpha-N-<br>arabinofuranosidase                | Nrml | 2.24 | 0.009 |
| ko00620 | Carbohydrate<br>Metabolism | Pyruvate metabolism                            | K01572: oxaloacetate<br>decarboxylase, beta<br>subunit | Nrml | 2.14 | 0.017 |
| ko00040 | Carbohydrate               | Pentose and glucuronate                        | K01686: mannonate                                      | Nrml | 2.07 | 0.026 |

|         |                            |                                                |                                                     |      |      |       |
|---------|----------------------------|------------------------------------------------|-----------------------------------------------------|------|------|-------|
|         | Metabolism                 | interconversions                               | dehydratase                                         |      |      |       |
| ko00010 | Carbohydrate<br>Metabolism | Glycolysis /<br>Gluconeogenesis                | K01785: aldose 1-<br>epimerase                      | Nrml | 2.24 | 0.012 |
| ko00052 | Carbohydrate<br>Metabolism | Galactose metabolism                           | K01785: aldose 1-<br>epimerase                      | Nrml | 2.24 | 0.012 |
| ko00520 | Carbohydrate<br>Metabolism | Amino sugar and nucleotide<br>sugar metabolism | K01791: UDP-N-<br>acetylglucosamine 2-<br>epimerase | Nrml | 2.36 | 0.028 |
| ko00010 | Carbohydrate<br>Metabolism | Glycolysis /<br>Gluconeogenesis                | K01834:<br>phosphoglycerate mutase                  | Nrml | 2.26 | 0.013 |
| ko00500 | Carbohydrate<br>Metabolism | Starch and sucrose<br>metabolism               | K05349: beta-glucosidase                            | Nrml | 2.52 | 0.061 |
| ko00520 | Carbohydrate<br>Metabolism | Amino sugar and nucleotide<br>sugar metabolism | K12373: beta-<br>hexosaminidase                     | Nrml | 2.42 | 0.072 |
| ko02030 | Cell Motility              | Bacterial chemotaxis                           | K03406: methyl-accepting<br>chemotaxis protein      | Nrml | 2.66 | 0.048 |
| ko04974 | Digestive<br>System        | Protein digestion and<br>absorption            | K01278: dipeptidyl-<br>peptidase 4                  | Nrml | 2.10 | 0.034 |

|         |                   |                                         |                                                                |      |      |       |
|---------|-------------------|-----------------------------------------|----------------------------------------------------------------|------|------|-------|
| ko03320 | Endocrine System  | PPAR signaling pathway                  | K01897: long-chain acyl-CoA synthetase                         | Nrml | 2.28 | 0.021 |
| ko04920 | Endocrine System  | Adipocytokine signaling pathway         | K01897: long-chain acyl-CoA synthetase                         | Nrml | 2.28 | 0.021 |
| ko00720 | Energy Metabolism | Carbon fixation pathways in prokaryotes | K00174: 2-oxoglutarate ferredoxin oxidoreductase subunit alpha | Nrml | 2.05 | 0.061 |
| ko00720 | Energy Metabolism | Carbon fixation pathways in prokaryotes | K00175: 2-oxoglutarate ferredoxin oxidoreductase subunit beta  | Nrml | 2.05 | 0.084 |
| ko00910 | Energy Metabolism | Nitrogen metabolism                     | K00266: glutamate synthase (NADPH/NADH) small chain            | Nrml | 2.38 | 0.002 |
| ko00920 | Energy Metabolism | Sulfur metabolism                       | K00640: serine O-acetyltransferase                             | Nrml | 2.05 | 0.048 |
| ko00680 | Energy Metabolism | Methane metabolism                      | K00850: 6-phosphofructokinase                                  | Nrml | 2.02 | 0.066 |
| ko00680 | Energy            | Methane metabolism                      | K01834:                                                        | Nrml | 2.26 | 0.013 |

|         |                                             |                          |                                                                                  |      |      |       |
|---------|---------------------------------------------|--------------------------|----------------------------------------------------------------------------------|------|------|-------|
|         | Metabolism                                  |                          | phosphoglycerate mutase                                                          |      |      |       |
| ko04122 | Folding,<br>Sorting and<br>Degradation      | Sulfur relay system      | K00566: tRNA (5-<br>methylaminomethyl-2-<br>thiouridylate)-<br>methyltransferase | Nrml | 2.05 | 0.066 |
| ko03018 | Folding,<br>Sorting and<br>Degradation      | RNA degradation          | K00850: 6-<br>phosphofructokinase                                                | Nrml | 2.02 | 0.066 |
| ko03060 | Folding,<br>Sorting and<br>Degradation      | Protein export           | K03100: signal peptidase<br>I                                                    | Nrml | 2.23 | 0.056 |
| ko03018 | Folding,<br>Sorting and<br>Degradation      | RNA degradation          | K03654: ATP-dependent<br>DNA helicase RecQ                                       | Nrml | 2.01 | 0.098 |
| ko00511 | Glycan<br>Biosynthesis<br>and<br>Metabolism | Other glycan degradation | K01190: beta-<br>galactosidase                                                   | Nrml | 2.73 | 0.021 |

|         |                                             |                                                  |                                 |      |      |       |
|---------|---------------------------------------------|--------------------------------------------------|---------------------------------|------|------|-------|
| ko00511 | Glycan<br>Biosynthesis<br>and<br>Metabolism | Other glycan degradation                         | K01201:<br>glucosylceramidase   | Nrml | 2.00 | 0.011 |
| ko00511 | Glycan<br>Biosynthesis<br>and<br>Metabolism | Other glycan degradation                         | K12373: beta-<br>hexosaminidase | Nrml | 2.42 | 0.072 |
| ko00531 | Glycan<br>Biosynthesis<br>and<br>Metabolism | Glycosaminoglycan<br>degradation                 | K12373: beta-<br>hexosaminidase | Nrml | 2.42 | 0.072 |
| ko00603 | Glycan<br>Biosynthesis<br>and<br>Metabolism | Glycosphingolipid<br>biosynthesis - globo series | K12373: beta-<br>hexosaminidase | Nrml | 2.42 | 0.072 |
| ko00604 | Glycan<br>Biosynthesis                      | Glycosphingolipid<br>biosynthesis - ganglio      | K12373: beta-<br>hexosaminidase | Nrml | 2.42 | 0.072 |



|         |                     |                                     |                                            |      |      |       |
|---------|---------------------|-------------------------------------|--------------------------------------------|------|------|-------|
|         | and<br>Metabolism   | series                              |                                            |      |      |       |
| ko00600 | Lipid<br>Metabolism | Sphingolipid metabolism             | K01190: beta-<br>galactosidase             | Nrml | 2.73 | 0.021 |
| ko00600 | Lipid<br>Metabolism | Sphingolipid metabolism             | K01201:<br>glucosylceramidase              | Nrml | 2.00 | 0.011 |
| ko00120 | Lipid<br>Metabolism | Primary bile acid<br>biosynthesis   | K01442: choloylglycine<br>hydrolase        | Nrml | 2.01 | 0.013 |
| ko00121 | Lipid<br>Metabolism | Secondary bile acid<br>biosynthesis | K01442: choloylglycine<br>hydrolase        | Nrml | 2.01 | 0.013 |
| ko00061 | Lipid<br>Metabolism | Fatty acid biosynthesis             | K01897: long-chain acyl-<br>CoA synthetase | Nrml | 2.28 | 0.021 |
| ko00071 | Lipid<br>Metabolism | Fatty acid degradation              | K01897: long-chain acyl-<br>CoA synthetase | Nrml | 2.28 | 0.021 |
| ko01212 | Lipid<br>Metabolism | Fatty acid metabolism               | K01897: long-chain acyl-<br>CoA synthetase | Nrml | 2.28 | 0.021 |
| ko01200 | Metabolism          | Carbon metabolism                   | K00640: serine O-<br>acetyltransferase     | Nrml | 2.05 | 0.048 |

|         |                             |                                      |                                                                      |      |      |       |
|---------|-----------------------------|--------------------------------------|----------------------------------------------------------------------|------|------|-------|
| ko01230 | Metabolism                  | Biosynthesis of amino acids          | K00640: serine O-acetyltransferase                                   | Nrml | 2.05 | 0.048 |
| ko01200 | Metabolism                  | Carbon metabolism                    | K00850: 6-phosphofructokinase                                        | Nrml | 2.02 | 0.066 |
| ko01230 | Metabolism                  | Biosynthesis of amino acids          | K00850: 6-phosphofructokinase                                        | Nrml | 2.02 | 0.066 |
| ko01200 | Metabolism                  | Carbon metabolism                    | K00874: 2-dehydro-3-deoxygluconokinase                               | Nrml | 2.04 | 0.004 |
| ko01200 | Metabolism                  | Carbon metabolism                    | K01834: phosphoglycerate mutase                                      | Nrml | 2.26 | 0.013 |
| ko01230 | Metabolism                  | Biosynthesis of amino acids          | K01834: phosphoglycerate mutase                                      | Nrml | 2.26 | 0.013 |
| ko01230 | Metabolism                  | Biosynthesis of amino acids          | K11755: phosphoribosyl-ATP pyrophosphohydrolase / phosphoribosyl-AMP | Nrml | 2.00 | 0.003 |
| ko00860 | Metabolism of Cofactors and | Porphyrin and chlorophyll metabolism | K00595: precorrin-6Y C5,15-methyltransferase /                       | Nrml | 2.10 | 0.016 |

|         |                                            |                                         |                                                           |      |      |       |
|---------|--------------------------------------------|-----------------------------------------|-----------------------------------------------------------|------|------|-------|
|         | Vitamins                                   |                                         | precorrin-8W<br>decarboxylase                             |      |      |       |
| ko00860 | Metabolism of<br>Cofactors and<br>Vitamins | Porphyrin and chlorophyll<br>metabolism | K02224: hydrogenobyric<br>acid a,c-diamide synthase       | Nrml | 2.10 | 0.028 |
| ko00460 | Metabolism of<br>Other Amino<br>Acids      | Cyanoamino acid<br>metabolism           | K05349: beta-glucosidase                                  | Nrml | 2.52 | 0.061 |
| ko00240 | Nucleotide<br>Metabolism                   | Pyrimidine metabolism                   | K01955: carbamoyl-<br>phosphate synthase large<br>subunit | Nrml | 2.11 | 0.009 |
| ko03030 | Replication<br>and Repair                  | DNA replication                         | K03111: single-strand<br>DNA-binding protein              | Nrml | 2.06 | 0.008 |
| ko03430 | Replication<br>and Repair                  | Mismatch repair                         | K03111: single-strand<br>DNA-binding protein              | Nrml | 2.06 | 0.008 |
| ko03440 | Replication<br>and Repair                  | Homologous recombination                | K03111: single-strand<br>DNA-binding protein              | Nrml | 2.06 | 0.008 |
| ko03440 | Replication                                | Homologous recombination                | K03655: ATP-dependent                                     | Nrml | 2.12 | 0.031 |

|         |                          |                                    |                                                                |      |      |       |
|---------|--------------------------|------------------------------------|----------------------------------------------------------------|------|------|-------|
|         | and Repair               |                                    | DNA helicase RecG                                              |      |      |       |
| ko04152 | Signal transduction      | AMPK signaling pathway             | K00850: 6-phosphofructokinase                                  | Nrml | 2.02 | 0.066 |
| ko02020 | Signal Transduction      | Two-component system               | K03406: methyl-accepting chemotaxis protein                    | Nrml | 2.66 | 0.048 |
| ko04142 | Transport and Catabolism | Lysosome                           | K01201: glucosylceramidase                                     | Nrml | 2.00 | 0.011 |
| ko04146 | Transport and Catabolism | Peroxisome                         | K01897: long-chain acyl-CoA synthetase                         | Nrml | 2.28 | 0.021 |
| ko04142 | Transport and Catabolism | Lysosome                           | K12373: beta-hexosaminidase                                    | Nrml | 2.42 | 0.072 |
| ko01200 | Metabolism               | Carbon metabolism                  | K00174: 2-oxoglutarate ferredoxin oxidoreductase subunit alpha | Nrml | 2.05 | 0.061 |
| ko00270 | Amino Acid Metabolism    | Cysteine and methionine metabolism | K01011: 3-mercaptopyruvate sulfurtransferase                   | SSc  | 2.03 | 0.098 |
| ko00400 | Amino Acid               | Phenylalanine, tyrosine and        | K01626: 3-deoxy-7-                                             | SSc  | 2.03 | 0.023 |

|         |                         |                                            |                                                           |     |      |       |
|---------|-------------------------|--------------------------------------------|-----------------------------------------------------------|-----|------|-------|
|         | Metabolism              | tryptophan biosynthesis                    | phosphoheptulonate synthase                               |     |      |       |
| ko00280 | Amino Acid Metabolism   | Valine, leucine and isoleucine degradation | K01782: 3-hydroxybutyryl-CoA epimerase                    | SSc | 2.02 | 0.003 |
| ko00310 | Amino Acid Metabolism   | Lysine degradation                         | K01782: 3-hydroxybutyryl-CoA epimerase                    | SSc | 2.02 | 0.003 |
| ko00380 | Amino Acid Metabolism   | Tryptophan metabolism                      | K01782: 3-hydroxybutyryl-CoA epimerase                    | SSc | 2.02 | 0.003 |
| ko00630 | Carbohydrate Metabolism | Glyoxylate and dicarboxylate metabolism    | K00123: formate dehydrogenase, alpha subunit              | SSc | 2.04 | 0.044 |
| ko00640 | Carbohydrate Metabolism | Propanoate metabolism                      | K01782: 3-hydroxybutyryl-CoA epimerase                    | SSc | 2.02 | 0.003 |
| ko00650 | Carbohydrate Metabolism | Butanoate metabolism                       | K01782: 3-hydroxybutyryl-CoA epimerase                    | SSc | 2.02 | 0.003 |
| ko02030 | Cell Motility           | Bacterial chemotaxis                       | K10439: ribose transport system substrate-binding protein | SSc | 2.12 | 0.072 |

|         |                                        |                                            |                                                         |     |      |       |
|---------|----------------------------------------|--------------------------------------------|---------------------------------------------------------|-----|------|-------|
| ko00680 | Energy<br>Metabolism                   | Methane metabolism                         | K00123: formate<br>dehydrogenase, alpha<br>subunit      | SSc | 2.04 | 0.044 |
| ko00920 | Energy<br>Metabolism                   | Sulfur metabolism                          | K01011: 3-<br>mercaptopyruvate<br>sulfurtransferase     | SSc | 2.03 | 0.098 |
| ko04122 | Folding,<br>Sorting and<br>Degradation | Sulfur relay system                        | K01011: 3-<br>mercaptopyruvate<br>sulfurtransferase     | SSc | 2.03 | 0.098 |
| ko00071 | Lipid<br>Metabolism                    | Fatty acid degradation                     | K01782: 3-hydroxybutyryl-<br>CoA epimerase              | SSc | 2.02 | 0.003 |
| ko01040 | Lipid<br>Metabolism                    | Biosynthesis of unsaturated<br>fatty acids | K01782: 3-hydroxybutyryl-<br>CoA epimerase              | SSc | 2.02 | 0.003 |
| ko01212 | Lipid<br>Metabolism                    | Fatty acid metabolism                      | K01782: 3-hydroxybutyryl-<br>CoA epimerase              | SSc | 2.02 | 0.003 |
| ko02060 | Membrane<br>Transport                  | Phosphotransferase system<br>(PTS)         | K08483:<br>phosphotransferase<br>system, enzyme I, PtsI | SSc | 2.01 | 0.009 |

|         |                                          |                         |                                                           |     |      |       |
|---------|------------------------------------------|-------------------------|-----------------------------------------------------------|-----|------|-------|
| ko02010 | Membrane Transport                       | ABC transporters        | K10439: ribose transport system substrate-binding protein | SSc | 2.12 | 0.072 |
| ko02010 | Membrane Transport                       | ABC transporters        | K10440: ribose transport system permease protein          | SSc | 2.05 | 0.034 |
| ko01200 | Metabolism                               | Carbon metabolism       | K00123: formate dehydrogenase, alpha subunit              | SSc | 2.04 | 0.044 |
| ko01200 | Metabolism                               | Carbon metabolism       | K01782: 3-hydroxybutyryl-CoA epimerase                    | SSc | 2.02 | 0.003 |
| ko00410 | Metabolism of Other Amino Acids          | beta-Alanine metabolism | K01782: 3-hydroxybutyryl-CoA epimerase                    | SSc | 2.02 | 0.003 |
| ko00281 | Metabolism of Terpenoids and Polyketides | Geraniol degradation    | K01782: 3-hydroxybutyryl-CoA epimerase                    | SSc | 2.02 | 0.003 |
| ko00903 | Metabolism of                            | Limonene and pinene     | K01782: 3-hydroxybutyryl-                                 | SSc | 2.02 | 0.003 |

|         |                                                    |                             |                                                      |     |      |       |
|---------|----------------------------------------------------|-----------------------------|------------------------------------------------------|-----|------|-------|
|         | Terpenoids<br>and<br>Polyketides                   | degradation                 | CoA epimerase                                        |     |      |       |
| ko00930 | Xenobiotics<br>Biodegradation<br>and<br>Metabolism | Caprolactam degradation     | K01782: 3-hydroxybutyryl-<br>CoA epimerase           | SSc | 2.02 | 0.003 |
| ko01230 | Metabolism                                         | Biosynthesis of amino acids | K01626: 3-deoxy-7-<br>phosphoheptulonate<br>synthase | SSc | 2.03 | 0.023 |

\* Certain KEGG gene names may appear more than once if they are associated with more than one KEGG pathway.



**Table 2B. Differences of KEGG pathway and orthology in SSc versus healthy controls (Nrml) in the sigmoid region.\***

| KEGG pathway  |                       |                                             | KEGG orthology                                      |                   |             |         |
|---------------|-----------------------|---------------------------------------------|-----------------------------------------------------|-------------------|-------------|---------|
| Ko Pathway ID | Pathway (L2)          | Pathway (L3)                                | KO Gene Name                                        | Gene increased in | Effect size | q value |
| ko00250       | Amino Acid Metabolism | Alanine, aspartate and glutamate metabolism | K00266: glutamate synthase (NADPH/NADH) small chain | Nrml              | 2.34        | 0.017   |
| ko00250       | Amino Acid Metabolism | Alanine, aspartate and glutamate metabolism | K01424: L-asparaginase                              | Nrml              | 2.13        | 0.001   |
| ko00250       | Amino Acid Metabolism | Alanine, aspartate and glutamate metabolism | K01955: carbamoyl-phosphate synthase large subunit  | Nrml              | 2.14        | 0.004   |
| ko00250       | Amino Acid Metabolism | Alanine, aspartate and glutamate metabolism | K01915: glutamine synthetase                        | Nrml              | 2.01        | 0.056   |
| ko00260       | Amino Acid Metabolism | Glycine, serine and threonine metabolism    | K01834: phosphoglycerate mutase                     | Nrml              | 2.23        | 0.004   |

|         |                                                      |                                       |                                                                                |      |      |       |
|---------|------------------------------------------------------|---------------------------------------|--------------------------------------------------------------------------------|------|------|-------|
| ko00270 | Amino Acid<br>Metabolism                             | Cysteine and methionine<br>metabolism | K00640: serine O-<br>acetyltransferase                                         | Nrml | 2.11 | 0.015 |
| ko00330 | Amino Acid<br>Metabolism                             | Arginine and proline<br>metabolism    | K01915: glutamine<br>synthetase                                                | Nrml | 2.01 | 0.056 |
| ko00340 | Amino Acid<br>Metabolism                             | Histidine metabolism                  | K11755: phosphoribosyl-<br>ATP<br>pyrophosphohydrolase /<br>phosphoribosyl-AMP | Nrml | 2.04 | 0.000 |
| ko00360 | Amino Acid<br>Metabolism                             | Phenylalanine metabolism              | K01912: phenylacetate-<br>CoA ligase                                           | Nrml | 2.08 | 0.020 |
| ko00521 | Biosynthesis of<br>Other<br>Secondary<br>Metabolites | Streptomycin biosynthesis             | K01790: dTDP-4-<br>dehydrorhamnose 3,5-<br>epimerase                           | Nrml | 2.02 | 0.011 |
| ko00940 | Biosynthesis of<br>Other<br>Secondary<br>Metabolites | Phenylpropanoid<br>biosynthesis       | K05349: beta-glucosidase                                                       | Nrml | 2.51 | 0.037 |

|         |                            |                                             |                                                                      |      |      |       |
|---------|----------------------------|---------------------------------------------|----------------------------------------------------------------------|------|------|-------|
| ko05230 | Cancers                    | Central carbon metabolism<br>in cancer      | K01834: phosphoglycerate<br>mutase                                   | Nrml | 2.23 | 0.004 |
| ko00010 | Carbohydrate<br>Metabolism | Glycolysis /<br>Gluconeogenesis             | K01785: aldose 1-<br>epimerase                                       | Nrml | 2.29 | 0.003 |
| ko00010 | Carbohydrate<br>Metabolism | Glycolysis /<br>Gluconeogenesis             | K01834: phosphoglycerate<br>mutase                                   | Nrml | 2.23 | 0.004 |
| ko00020 | Carbohydrate<br>Metabolism | Citrate cycle (TCA cycle)                   | K00174: 2-oxoglutarate<br>ferredoxin oxidoreductase<br>subunit alpha | Nrml | 2.13 | 0.015 |
| ko00020 | Carbohydrate<br>Metabolism | Citrate cycle (TCA cycle)                   | K00175: 2-oxoglutarate<br>ferredoxin oxidoreductase<br>subunit beta  | Nrml | 2.12 | 0.014 |
| ko00020 | Carbohydrate<br>Metabolism | Citrate cycle (TCA cycle)                   | K01960: pyruvate<br>carboxylase subunit B                            | Nrml | 2.03 | 0.010 |
| ko00030 | Carbohydrate<br>Metabolism | Pentose phosphate<br>pathway                | K00874: 2-dehydro-3-<br>deoxygluconokinase                           | Nrml | 2.02 | 0.008 |
| ko00040 | Carbohydrate<br>Metabolism | Pentose and glucuronate<br>interconversions | K01051: pectinesterase                                               | Nrml | 2.15 | 0.015 |

|         |                            |                                             |                                                                     |      |      |       |
|---------|----------------------------|---------------------------------------------|---------------------------------------------------------------------|------|------|-------|
| ko00040 | Carbohydrate<br>Metabolism | Pentose and glucuronate<br>interconversions | K01686: mannonate<br>dehydratase                                    | Nrml | 2.14 | 0.022 |
| ko00040 | Carbohydrate<br>Metabolism | Pentose and glucuronate<br>interconversions | K01815: 4-deoxy-L-threo-<br>5-hexosulose-uronate<br>ketol-isomerase | Nrml | 2.05 | 0.003 |
| ko00052 | Carbohydrate<br>Metabolism | Galactose metabolism                        | K01187: alpha-glucosidase                                           | Nrml | 2.45 | 0.014 |
| ko00052 | Carbohydrate<br>Metabolism | Galactose metabolism                        | K01190: beta-<br>galactosidase                                      | Nrml | 2.79 | 0.007 |
| ko00052 | Carbohydrate<br>Metabolism | Galactose metabolism                        | K01785: aldose 1-<br>epimerase                                      | Nrml | 2.29 | 0.003 |
| ko00052 | Carbohydrate<br>Metabolism | Galactose metabolism                        | K07407: alpha-<br>galactosidase                                     | Nrml | 2.04 | 0.060 |
| ko00052 | Carbohydrate<br>Metabolism | Galactose metabolism                        | K12308: beta-<br>galactosidase                                      | Nrml | 2.04 | 0.020 |
| ko00500 | Carbohydrate<br>Metabolism | Starch and sucrose<br>metabolism            | K01051: pectinesterase                                              | Nrml | 2.15 | 0.015 |
| ko00500 | Carbohydrate               | Starch and sucrose                          | K01187: alpha-glucosidase                                           | Nrml | 2.45 | 0.014 |

|         |                            |                                                |                                                        |      |      |       |
|---------|----------------------------|------------------------------------------------|--------------------------------------------------------|------|------|-------|
|         | Metabolism                 | metabolism                                     |                                                        |      |      |       |
| ko00500 | Carbohydrate<br>Metabolism | Starch and sucrose<br>metabolism               | K05349: beta-glucosidase                               | Nrml | 2.51 | 0.037 |
| ko00520 | Carbohydrate<br>Metabolism | Amino sugar and nucleotide<br>sugar metabolism | K<br>: N-acylneuraminate<br>cytidyltransferase         | Nrml | 2.07 | 0.001 |
| ko00520 | Carbohydrate<br>Metabolism | Amino sugar and nucleotide<br>sugar metabolism | K01209: alpha-N-<br>arabinofuranosidase                | Nrml | 2.23 | 0.002 |
| ko00520 | Carbohydrate<br>Metabolism | Amino sugar and nucleotide<br>sugar metabolism | K01791: UDP-N-<br>acetylglucosamine 2-<br>epimerase    | Nrml | 2.42 | 0.015 |
| ko00520 | Carbohydrate<br>Metabolism | Amino sugar and nucleotide<br>sugar metabolism | K12373: beta-<br>hexosaminidase                        | Nrml | 2.52 | 0.040 |
| ko00620 | Carbohydrate<br>Metabolism | Pyruvate metabolism                            | K01572: oxaloacetate<br>decarboxylase, beta<br>subunit | Nrml | 2.19 | 0.006 |
| ko00620 | Carbohydrate<br>Metabolism | Pyruvate metabolism                            | K01960: pyruvate<br>carboxylase subunit B              | Nrml | 2.03 | 0.010 |

|         |                            |                                            |                                                                      |      |      |       |
|---------|----------------------------|--------------------------------------------|----------------------------------------------------------------------|------|------|-------|
| ko00630 | Carbohydrate<br>Metabolism | Glyoxylate and<br>dicarboxylate metabolism | K01915: glutamine<br>synthetase                                      | Nrml | 2.01 | 0.056 |
| ko04974 | Digestive<br>System        | Protein digestion and<br>absorption        | K01278: dipeptidyl-<br>peptidase 4                                   | Nrml | 2.18 | 0.008 |
| ko03320 | Endocrine<br>System        | PPAR signaling pathway                     | K01897: long-chain acyl-<br>CoA synthetase                           | Nrml | 2.36 | 0.004 |
| ko04920 | Endocrine<br>System        | Adipocytokine signaling<br>pathway         | K01897: long-chain acyl-<br>CoA synthetase                           | Nrml | 2.36 | 0.004 |
| ko00680 | Energy<br>Metabolism       | Methane metabolism                         | K01834: phosphoglycerate<br>mutase                                   | Nrml | 2.23 | 0.004 |
| ko00720 | Energy<br>Metabolism       | Carbon fixation pathways in<br>prokaryotes | K00174: 2-oxoglutarate<br>ferredoxin oxidoreductase<br>subunit alpha | Nrml | 2.13 | 0.015 |
| ko00720 | Energy<br>Metabolism       | Carbon fixation pathways in<br>prokaryotes | K00175: 2-oxoglutarate<br>ferredoxin oxidoreductase<br>subunit beta  | Nrml | 2.12 | 0.014 |
| ko00720 | Energy<br>Metabolism       | Carbon fixation pathways in<br>prokaryotes | K01960: pyruvate<br>carboxylase subunit B                            | Nrml | 2.03 | 0.010 |

|         |                                        |                          |                                                                                  |      |      |       |
|---------|----------------------------------------|--------------------------|----------------------------------------------------------------------------------|------|------|-------|
| ko00910 | Energy<br>Metabolism                   | Nitrogen metabolism      | K00266: glutamate<br>synthase (NADPH/NADH)<br>small chain                        | Nrml | 2.34 | 0.017 |
| ko00910 | Energy<br>Metabolism                   | Nitrogen metabolism      | K01915: glutamine<br>synthetase                                                  | Nrml | 2.01 | 0.056 |
| ko00920 | Energy<br>Metabolism                   | Sulfur metabolism        | K00640: serine O-<br>acetyltransferase                                           | Nrml | 2.11 | 0.015 |
| ko03018 | Folding,<br>Sorting and<br>Degradation | RNA degradation          | K03654: ATP-dependent<br>DNA helicase RecQ                                       | Nrml | 2.06 | 0.013 |
| ko03060 | Folding,<br>Sorting and<br>Degradation | Protein export           | K03100: signal peptidase I                                                       | Nrml | 2.25 | 0.015 |
| ko04122 | Folding,<br>Sorting and<br>Degradation | Sulfur relay system      | K00566: tRNA (5-<br>methylaminomethyl-2-<br>thiouridylate)-<br>methyltransferase | Nrml | 2.13 | 0.007 |
| ko00511 | Glycan                                 | Other glycan degradation | K01190: beta-                                                                    | Nrml | 2.79 | 0.007 |

|         |                                             |                                  |                                 |      |      |       |
|---------|---------------------------------------------|----------------------------------|---------------------------------|------|------|-------|
|         | Biosynthesis<br>and<br>Metabolism           |                                  | galactosidase                   |      |      |       |
| ko00511 | Glycan<br>Biosynthesis<br>and<br>Metabolism | Other glycan degradation         | K01201:<br>glucosylceramidase   | Nrml | 2.06 | 0.006 |
| ko00511 | Glycan<br>Biosynthesis<br>and<br>Metabolism | Other glycan degradation         | K12373: beta-<br>hexosaminidase | Nrml | 2.52 | 0.040 |
| ko00511 | Glycan<br>Biosynthesis<br>and<br>Metabolism | Other glycan degradation         | K01206: alpha-L-<br>fucosidase  | Nrml | 2.51 | 0.056 |
| ko00531 | Glycan<br>Biosynthesis<br>and               | Glycosaminoglycan<br>degradation | K12373: beta-<br>hexosaminidase | Nrml | 2.52 | 0.040 |



|         |                                             |                                                       |                                            |      |      |       |
|---------|---------------------------------------------|-------------------------------------------------------|--------------------------------------------|------|------|-------|
|         | Metabolism                                  |                                                       |                                            |      |      |       |
| ko00603 | Glycan<br>Biosynthesis<br>and<br>Metabolism | Glycosphingolipid<br>biosynthesis - globo series      | K12373: beta-<br>hexosaminidase            | Nrml | 2.52 | 0.040 |
| ko00603 | Glycan<br>Biosynthesis<br>and<br>Metabolism | Glycosphingolipid<br>biosynthesis - globo series      | K07407: alpha-<br>galactosidase            | Nrml | 2.04 | 0.060 |
| ko00604 | Glycan<br>Biosynthesis<br>and<br>Metabolism | Glycosphingolipid<br>biosynthesis - ganglio<br>series | K12373: beta-<br>hexosaminidase            | Nrml | 2.52 | 0.040 |
| ko00061 | Lipid<br>Metabolism                         | Fatty acid biosynthesis                               | K01897: long-chain acyl-<br>CoA synthetase | Nrml | 2.36 | 0.004 |
| ko00071 | Lipid<br>Metabolism                         | Fatty acid degradation                                | K01897: long-chain acyl-<br>CoA synthetase | Nrml | 2.36 | 0.004 |
| ko00561 | Lipid                                       | Glycerolipid metabolism                               | K07407: alpha-                             | Nrml | 2.04 | 0.060 |

|         |                     |                             |                                            |      |      |       |
|---------|---------------------|-----------------------------|--------------------------------------------|------|------|-------|
|         | Metabolism          |                             | galactosidase                              |      |      |       |
| ko00600 | Lipid<br>Metabolism | Sphingolipid metabolism     | K01190: beta-<br>galactosidase             | Nrml | 2.79 | 0.007 |
| ko00600 | Lipid<br>Metabolism | Sphingolipid metabolism     | K01201:<br>glucosylceramidase              | Nrml | 2.06 | 0.006 |
| ko00600 | Lipid<br>Metabolism | Sphingolipid metabolism     | K07407: alpha-<br>galactosidase            | Nrml | 2.04 | 0.060 |
| ko01212 | Lipid<br>Metabolism | Fatty acid metabolism       | K01897: long-chain acyl-<br>CoA synthetase | Nrml | 2.36 | 0.004 |
| ko01200 | Metabolism          | Carbon metabolism           | K00640: serine O-<br>acetyltransferase     | Nrml | 2.11 | 0.015 |
| ko01200 | Metabolism          | Carbon metabolism           | K00874: 2-dehydro-3-<br>deoxygluconokinase | Nrml | 2.02 | 0.008 |
| ko01200 | Metabolism          | Carbon metabolism           | K01834: phosphoglycerate<br>mutase         | Nrml | 2.23 | 0.004 |
| ko01200 | Metabolism          | Carbon metabolism           | K01960: pyruvate<br>carboxylase subunit B  | Nrml | 2.03 | 0.010 |
| ko01230 | Metabolism          | Biosynthesis of amino acids | K00640: serine O-                          | Nrml | 2.11 | 0.015 |

|         |                                      |                                      |                                                                           |      |      |       |
|---------|--------------------------------------|--------------------------------------|---------------------------------------------------------------------------|------|------|-------|
|         |                                      |                                      | acetyltransferase                                                         |      |      |       |
| ko01230 | Metabolism                           | Biosynthesis of amino acids          | K01834: phosphoglycerate mutase                                           | Nrml | 2.23 | 0.004 |
| ko01230 | Metabolism                           | Biosynthesis of amino acids          | K11755: phosphoribosyl-ATP pyrophosphohydrolase / phosphoribosyl-AMP      | Nrml | 2.04 | 0.000 |
| ko01230 | Metabolism                           | Biosynthesis of amino acids          | K01915: glutamine synthetase                                              | Nrml | 2.01 | 0.056 |
| ko01230 | Metabolism                           | Biosynthesis of amino acids          | K01960: pyruvate carboxylase subunit B                                    | Nrml | 2.03 | 0.010 |
| ko00860 | Metabolism of Cofactors and Vitamins | Porphyrin and chlorophyll metabolism | K00595: precorrin-6Y C5,15-methyltransferase / precorrin-8W decarboxylase | Nrml | 2.09 | 0.011 |
| ko00860 | Metabolism of Cofactors and Vitamins | Porphyrin and chlorophyll metabolism | K02224: hydrogenobyric acid a,c-diamide synthase                          | Nrml | 2.06 | 0.040 |

|         |                                          |                                      |                                              |      |      |       |
|---------|------------------------------------------|--------------------------------------|----------------------------------------------|------|------|-------|
| ko00860 | Metabolism of Cofactors and Vitamins     | Porphyrin and chlorophyll metabolism | K01599: uroporphyrinogen decarboxylase       | Nrml | 2.01 | 0.056 |
| ko00460 | Metabolism of Other Amino Acids          | Cyanoamino acid metabolism           | K05349: beta-glucosidase                     | Nrml | 2.51 | 0.037 |
| ko00460 | Metabolism of Other Amino Acids          | Cyanoamino acid metabolism           | K01424: L-asparaginase                       | Nrml | 2.13 | 0.001 |
| ko00523 | Metabolism of Terpenoids and Polyketides | Polyketide sugar unit biosynthesis   | K01790: dTDP-4-dehydrorhamnose 3,5-epimerase | Nrml | 2.02 | 0.011 |
| ko04724 | Nervous System                           | Glutamatergic synapse                | K01915: glutamine synthetase                 | Nrml | 2.01 | 0.056 |
| ko00230 | Nucleotide Metabolism                    | Purine metabolism                    | K00951: GTP pyrophosphokinase                | Nrml | 2.01 | 0.002 |
| ko00230 | Nucleotide                               | Purine metabolism                    | K02342: DNA polymerase                       | Nrml | 2.03 | 0.001 |

|         |                        |                          |                                                    |      |      |       |
|---------|------------------------|--------------------------|----------------------------------------------------|------|------|-------|
|         | Metabolism             |                          | III subunit epsilon                                |      |      |       |
| ko00240 | Nucleotide Metabolism  | Pyrimidine metabolism    | K01955: carbamoyl-phosphate synthase large subunit | Nrml | 2.14 | 0.004 |
| ko04727 | Organismal Systems     | GABAergic synapse        | K01915: glutamine synthetase                       | Nrml | 2.01 | 0.056 |
| ko03030 | Replication and Repair | DNA replication          | K03111: single-strand DNA-binding protein          | Nrml | 2.02 | 0.013 |
| ko03430 | Replication and Repair | Mismatch repair          | K03111: single-strand DNA-binding protein          | Nrml | 2.02 | 0.013 |
| ko03440 | Replication and Repair | Homologous recombination | K03111: single-strand DNA-binding protein          | Nrml | 2.02 | 0.013 |
| ko03440 | Replication and Repair | Homologous recombination | K03655: ATP-dependent DNA helicase RecG            | Nrml | 2.13 | 0.017 |
| ko02020 | Signal Transduction    | Two-component system     | K01915: glutamine synthetase                       | Nrml | 2.01 | 0.056 |
| ko02020 | Signal Transduction    | Two-component system     | K07713: two-component system, NtrC family,         | Nrml | 2.03 | 0.022 |

|         |                          |                                            |                                                                |      |      |       |
|---------|--------------------------|--------------------------------------------|----------------------------------------------------------------|------|------|-------|
|         |                          |                                            | response regulator HydG                                        |      |      |       |
| ko04142 | Transport and Catabolism | Lysosome                                   | K01201: glucosylceramidase                                     | Nrml | 2.06 | 0.006 |
| ko04142 | Transport and Catabolism | Lysosome                                   | K12373: beta-hexosaminidase                                    | Nrml | 2.52 | 0.040 |
| ko04146 | Transport and Catabolism | Peroxisome                                 | K01897: long-chain acyl-CoA synthetase                         | Nrml | 2.36 | 0.004 |
| ko01200 | #N/A                     | Carbon metabolism                          | K00174: 2-oxoglutarate ferredoxin oxidoreductase subunit alpha | Nrml | 2.13 | 0.015 |
| ko00270 | Amino Acid Metabolism    | Cysteine and methionine metabolism         | K01011: 3-mercaptopyruvate sulfurtransferase                   | SSc  | 2.05 | 0.011 |
| ko00280 | Amino Acid Metabolism    | Valine, leucine and isoleucine degradation | K01782: 3-hydroxybutyryl-CoA epimerase                         | SSc  | 2.04 | 0.004 |
| ko00310 | Amino Acid Metabolism    | Lysine degradation                         | K01782: 3-hydroxybutyryl-CoA epimerase                         | SSc  | 2.04 | 0.004 |
| ko00380 | Amino Acid               | Tryptophan metabolism                      | K01782: 3-hydroxybutyryl-                                      | SSc  | 2.04 | 0.004 |

|         |                         |                                                     |                                                           |     |      |       |
|---------|-------------------------|-----------------------------------------------------|-----------------------------------------------------------|-----|------|-------|
|         | Metabolism              |                                                     | CoA epimerase                                             |     |      |       |
| ko00400 | Amino Acid Metabolism   | Phenylalanine, tyrosine and tryptophan biosynthesis | K01626: 3-deoxy-7-phosphoheptulonate synthase             | SSc | 2.12 | 0.003 |
| ko00630 | Carbohydrate Metabolism | Glyoxylate and dicarboxylate metabolism             | K00123: formate dehydrogenase, alpha subunit              | SSc | 2.00 | 0.022 |
| ko00640 | Carbohydrate Metabolism | Propanoate metabolism                               | K01782: 3-hydroxybutyryl-CoA epimerase                    | SSc | 2.04 | 0.004 |
| ko00650 | Carbohydrate Metabolism | Butanoate metabolism                                | K01782: 3-hydroxybutyryl-CoA epimerase                    | SSc | 2.04 | 0.004 |
| ko02030 | Cell Motility           | Bacterial chemotaxis                                | K10439: ribose transport system substrate-binding protein | SSc | 2.18 | 0.014 |
| ko00680 | Energy Metabolism       | Methane metabolism                                  | K00123: formate dehydrogenase, alpha subunit              | SSc | 2.00 | 0.022 |
| ko00920 | Energy                  | Sulfur metabolism                                   | K01011: 3-                                                | SSc | 2.05 | 0.011 |

|         |                                             |                                            |                                                                                        |     |      |       |
|---------|---------------------------------------------|--------------------------------------------|----------------------------------------------------------------------------------------|-----|------|-------|
|         | Metabolism                                  |                                            | mercaptopyruvate<br>sulfurtransferase                                                  |     |      |       |
| ko04122 | Folding,<br>Sorting and<br>Degradation      | Sulfur relay system                        | K01011: 3-<br>mercaptopyruvate<br>sulfurtransferase                                    | SSc | 2.05 | 0.011 |
| ko00550 | Glycan<br>Biosynthesis<br>and<br>Metabolism | Peptidoglycan biosynthesis                 | K07258: D-alanyl-D-<br>alanine carboxypeptidase<br>(penicillin-binding protein<br>5/6) | SSc | 2.08 | 0.037 |
| ko00071 | Lipid<br>Metabolism                         | Fatty acid degradation                     | K01782: 3-hydroxybutyryl-<br>CoA epimerase                                             | SSc | 2.04 | 0.004 |
| ko01040 | Lipid<br>Metabolism                         | Biosynthesis of unsaturated<br>fatty acids | K01782: 3-hydroxybutyryl-<br>CoA epimerase                                             | SSc | 2.04 | 0.004 |
| ko01212 | Lipid<br>Metabolism                         | Fatty acid metabolism                      | K01782: 3-hydroxybutyryl-<br>CoA epimerase                                             | SSc | 2.04 | 0.004 |
| ko02010 | Membrane<br>Transport                       | ABC transporters                           | K10439: ribose transport<br>system substrate-binding<br>protein                        | SSc | 2.18 | 0.014 |



|         |                                 |                                 |                                                   |     |      |       |
|---------|---------------------------------|---------------------------------|---------------------------------------------------|-----|------|-------|
| ko02010 | Membrane Transport              | ABC transporters                | K10440: ribose transport system permease protein  | SSc | 2.03 | 0.018 |
| ko02060 | Membrane Transport              | Phosphotransferase system (PTS) | K08483: phosphotransferase system, enzyme I, PtsI | SSc | 2.03 | 0.001 |
| ko03070 | Membrane Transport              | Bacterial secretion system      | K02453: general secretion pathway protein D       | SSc | 2.03 | 0.003 |
| ko01200 | Metabolism                      | Carbon metabolism               | K00123: formate dehydrogenase, alpha subunit      | SSc | 2.00 | 0.022 |
| ko01200 | Metabolism                      | Carbon metabolism               | K01782: 3-hydroxybutyryl-CoA epimerase            | SSc | 2.04 | 0.004 |
| ko00410 | Metabolism of Other Amino Acids | beta-Alanine metabolism         | K01782: 3-hydroxybutyryl-CoA epimerase            | SSc | 2.04 | 0.004 |
| ko00281 | Metabolism of Terpenoids and    | Geraniol degradation            | K01782: 3-hydroxybutyryl-CoA epimerase            | SSc | 2.04 | 0.004 |

|         |                                                    |                                    |                                                      |     |      |       |
|---------|----------------------------------------------------|------------------------------------|------------------------------------------------------|-----|------|-------|
|         | Polyketides                                        |                                    |                                                      |     |      |       |
| ko00903 | Metabolism of<br>Terpenoids<br>and<br>Polyketides  | Limonene and pinene<br>degradation | K01782: 3-hydroxybutyryl-<br>CoA epimerase           | SSc | 2.04 | 0.004 |
| ko00930 | Xenobiotics<br>Biodegradation<br>and<br>Metabolism | Caprolactam degradation            | K01782: 3-hydroxybutyryl-<br>CoA epimerase           | SSc | 2.04 | 0.004 |
| ko01230 | Metabolism                                         | Biosynthesis of amino acids        | K01626: 3-deoxy-7-<br>phosphoheptulonate<br>synthase | SSc | 2.12 | 0.003 |

\* Certain KEGG gene names may appear more than once if they are associated with more than one KEGG pathway.
